# Supplementary material for: Lanthanide-doped Na2MgScF7 exhibiting downshifting and upconversion emissions for multicolor anti-counterfeiting
Source: Royal Society of Chemistry journal article supplement (doi:10.1039/d3dt00746d), 2023-01-01
Supplement: d3dt00746d1.pdf [file d3dt00746d1.pdf]

## Lanthanide Doped $\text{Na}_2\text{MgScF}_7$ with Downshifting and Upconversion Emissions for Multicolor Anti-Counterfeiting

Chengyu Zhuo<sup>a,b</sup>, Zeyu Lyu<sup>\*b</sup>, Dashuai Sun<sup>b</sup>, Sida Shen<sup>b</sup>, Taixing Tan<sup>b</sup>, Shuai Wei<sup>a,b</sup>,  
Zhijun Li<sup>a,b</sup>, Pengcheng Luo<sup>a,b</sup>, and Hongpeng You<sup>\*a,b,c</sup>

<sup>a</sup>School of Chemistry and Chemical Engineering, Nanchang University, Nanchang  
330031, P.R. China.

<sup>b</sup>Ganjiang Innovation Academy, Chinese Academy of Sciences, Ganzhou 341000, P.  
R. China.

<sup>c</sup>State Key Laboratory of Rare Earth Resource Utilization, Changchun Institute of  
Applied Chemistry, Chinese Academy of Sciences, Changchun 130022, P. R. China.

\*E-mail address: [hpyou@ciac.ac.cn](mailto:hpyou@ciac.ac.cn), [zylyu@gia.cas.cn](mailto:zylyu@gia.cas.cn).

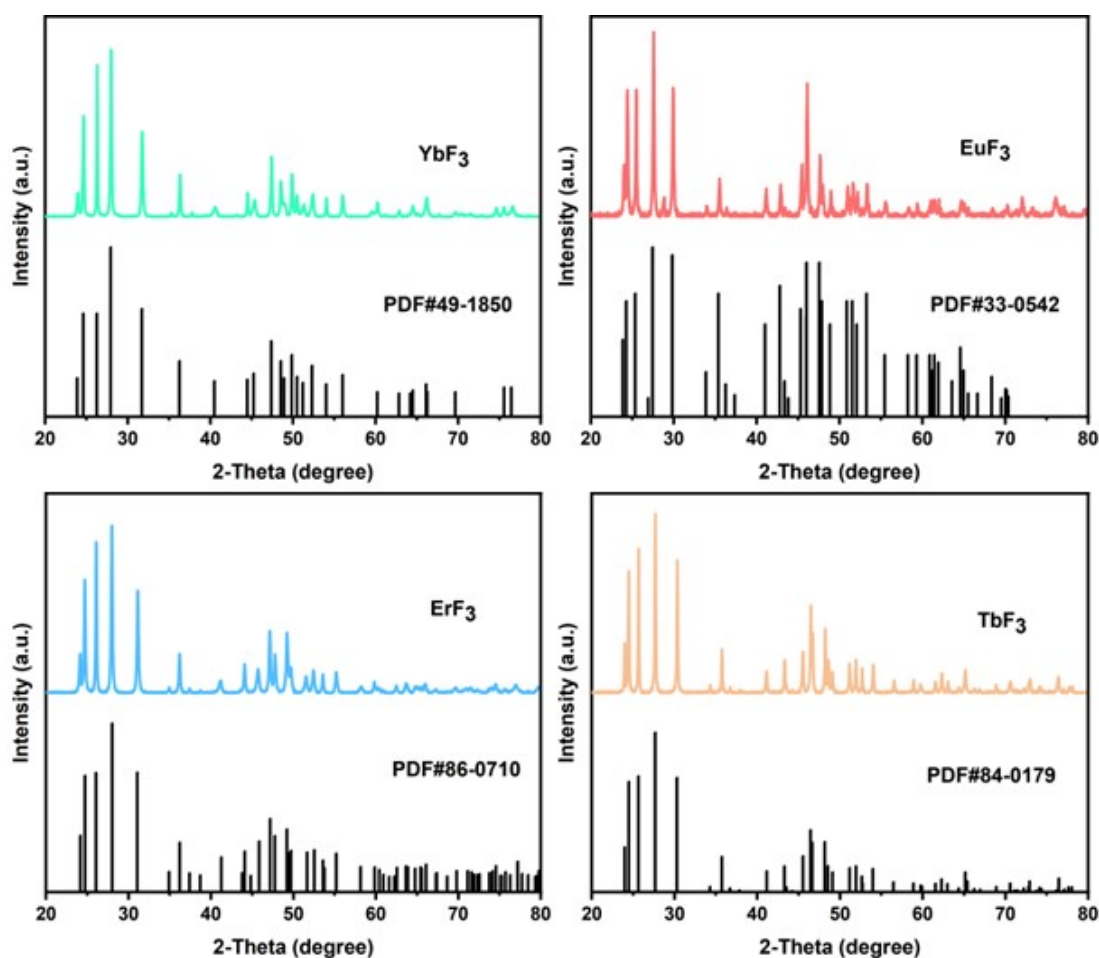

Fig. S1 XRD patterns of the prepared TbF<sub>3</sub>, EuF<sub>3</sub>, ErF<sub>3</sub> and YbF<sub>3</sub> samples.

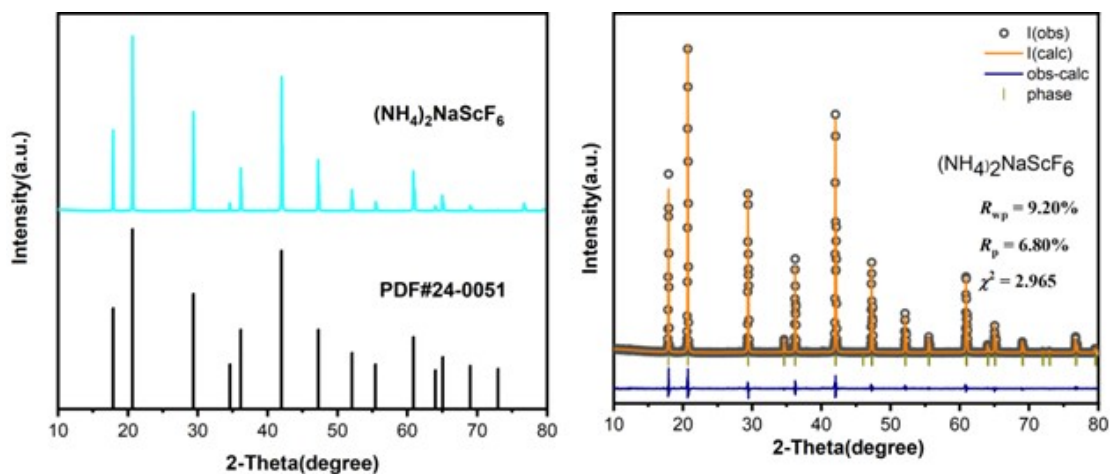

**Fig. S2** XRD patterns of the  $(\text{NH}_4)_2\text{NaScF}_6$  samples and the Rietveld refinement results of the  $(\text{NH}_4)_3\text{NaScF}_6$  samples.

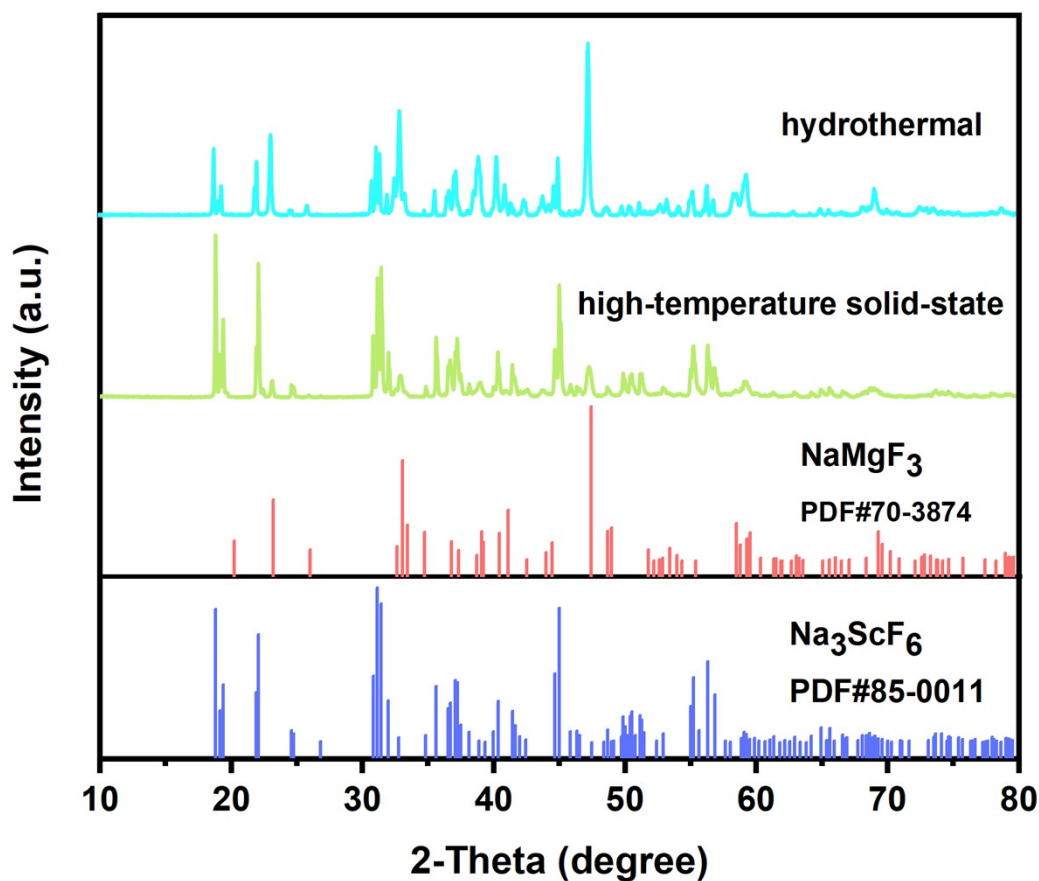

**Fig. S3** The products from direct high-temperature solid-state reaction of  $\text{MgF}_2$ ,  $\text{NaF}$ ,  $(\text{NH}_4)\text{ScF}_6$ , and hydrothermal reaction of precipitation of  $\text{Na}^+$ ,  $\text{Mg}^{2+}$ ,  $\text{Sc}^{3+}$ , and  $\text{F}^-$  in solution. Noted that both these two reactions cannot obtain the target NMSF.

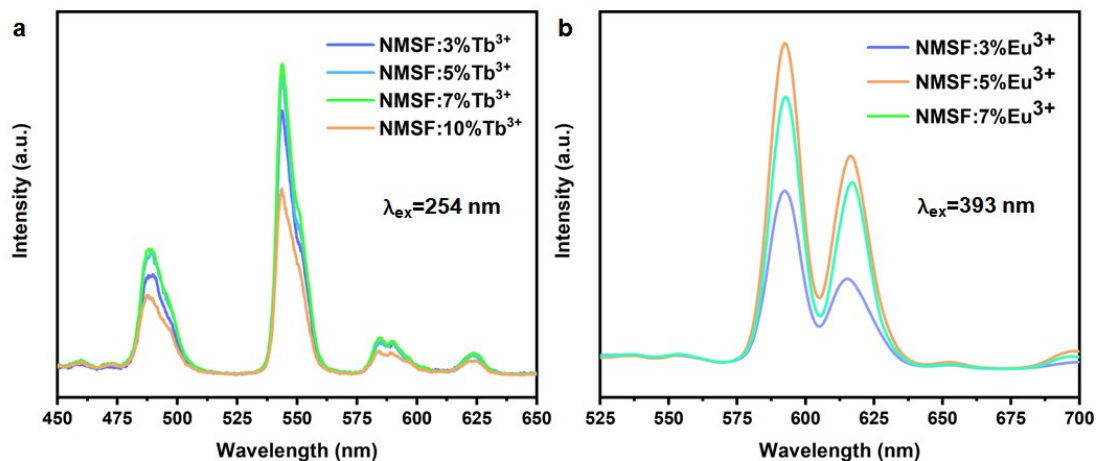

**Fig. S4** PL spectra of the NMSF phosphors doped with different concentrations of  $Tb^{3+}$  or  $Eu^{3+}$ .

**Table S1.** Rietveld refinement results and crystal data for NMSF and NMSF:5% $Tb^{3+}$

| Sample          | NMSF                                 | NMSF:5% $Tb^{3+}$                    |
|-----------------|--------------------------------------|--------------------------------------|
| Symmetry        | Orthorhombic                         | Orthorhombic                         |
| Space group     | <i>Imma</i> (no. 74)                 | <i>Imma</i> (no. 74)                 |
| Cell parameters | $a = 10.40860(18) \text{ \AA}$       | $a = 10.36956(15) \text{ \AA}$       |
|                 | $b = 7.32804(12) \text{ \AA}$        | $b = 7.30959(9) \text{ \AA}$         |
|                 | $c = 7.52879(11) \text{ \AA}$        | $c = 7.51215(7) \text{ \AA}$         |
|                 | $\alpha = \beta = \gamma = 90^\circ$ | $\alpha = \beta = \gamma = 90^\circ$ |
|                 | $V = 574.256(24) \text{ \AA}^3$      | $V = 569.400(12) \text{ \AA}^3$      |
|                 | $Z=4$                                | $Z=4$                                |
